# Supplementary material for: Translation in astrocyte distal processes sets molecular heterogeneity at the gliovascular interface
Source: PubMed Central journal article supplement (PMC5368712; doi:10.1038/celldisc.2017.5), 2017-03-28
Supplement: celldisc20175-s3.pdf [file celldisc20175-s3.pdf]

**Table S1** The astrocyte endfeet transcriptome. Microarray comparison of mRNAs extracted from brain vessels with or without partial basal lamina (BL) enzymatic digestion. Astrocyte endfeet mRNAs are depleted upon BL digestion with a fold change  $\leq -2$ ,  $p \leq 0.05$  compared with the undigested vessels.

| FAST DB STABLE ID | Gene name | Gene description                                                                                     | Change in expression upon BL digestion |         |
|-------------------|-----------|------------------------------------------------------------------------------------------------------|----------------------------------------|---------|
|                   |           |                                                                                                      | Fold Change                            | p-value |
| GSMG0022641       | Lcn2      | lipocalin 2                                                                                          | -7.30                                  | 8.5E-03 |
| GSMG0025256       | Tmem212   | transmembrane protein 212                                                                            | -7.26                                  | 1.8E-04 |
| GSMG0019171       | Slc14a2   | solute carrier family 14 (urea transporter), member 2                                                | -7.12                                  | 5.0E-03 |
| GSMG0011339       | Dnah12    | dynein, axonemal, heavy chain 12                                                                     | -6.94                                  | 2.2E-04 |
| GSMG0037483       | Ttc29     | tetratricopeptide repeat domain 29                                                                   | -6.85                                  | 4.0E-04 |
| GSMG0011341       | Dnah12    | dynein, axonemal, heavy chain 12                                                                     | -6.55                                  | 4.1E-05 |
| GSMG0008793       | Cdhr3     | cadherin-related family member 3                                                                     | -6.47                                  | 2.2E-04 |
| GSMG0007463       | Gfap      | glial fibrillary acidic protein                                                                      | -5.19                                  | 4.5E-07 |
| GSMG0016200       | T2        | brachyury 2                                                                                          | -5.07                                  | 3.4E-04 |
| GSMG0026519       | Ccdc180   | coiled-coil domain containing 180                                                                    | -5.05                                  | 4.6E-04 |
| GSMG0013872       | Rgs22     | regulator of G-protein signalling 22                                                                 | -5.04                                  | 7.7E-05 |
| GSMG0029823       | Dnah10    | dynein, axonemal, heavy chain 10                                                                     | -4.91                                  | 1.0E-03 |
| GSMG0037721       | Lrrc36    | leucine rich repeat containing 36                                                                    | -4.91                                  | 1.2E-04 |
| GSMG0018737       | Aqp4      | aquaporin 4                                                                                          | -4.85                                  | 1.0E-04 |
| GSMG0036594       | Dnah3     | dynein, axonemal, heavy chain 3                                                                      | -4.82                                  | 3.6E-04 |
| GSMG0024721       | Spag17    | sperm associated antigen 17                                                                          | -4.80                                  | 1.6E-04 |
| GSMG0000970       | Myoc      | myocilin                                                                                             | -4.79                                  | 4.3E-06 |
| GSMG0023304       | Bbox1     | butyrobetaine (gamma), 2-oxoglutarate dioxygenase                                                    | -4.76                                  | 1.6E-04 |
| GSMG0014419       | Adamts20  | a disintegrin-like and metallopeptidase (reprolysin) family 20 member 1                              | -4.69                                  | 1.0E-04 |
| GSMG0028313       | Mfsd2a    | major facilitator superfamily domain containing 2                                                    | -4.65                                  | 8.5E-05 |
| GSMG0025440       | Ankub1    | ankrin repeat and ubiquitin domain containing 1                                                      | -4.52                                  | 3.6E-05 |
| GSMG0014362       | Mlc1      | megalencephalic leukoencephalopathy with subcortical calcifications 1                                | -4.50                                  | 1.5E-05 |
| GSMG0003799       | Adgb      | androglobin                                                                                          | -4.39                                  | 8.3E-07 |
| GSMG0044779       | Mir495    | microRNA 495                                                                                         | -4.36                                  | 6.4E-03 |
| GSMG0016774       | Unc5cl    | unc-5 homolog C (C. elegans)-like                                                                    | -4.36                                  | 2.0E-04 |
| GSMG0043878       | Lrrc71    | leucine rich repeat containing 71                                                                    | -4.27                                  | 1.6E-05 |
| GSMG0038237       | Got11     | glutamic-oxaloacetic transaminase 1-like 1                                                           | -4.17                                  | 2.6E-03 |
| GSMG0029799       | Lrrc43    | leucine rich repeat containing 43                                                                    | -4.12                                  | 2.8E-04 |
| GSMG0051981       | Dthd1     | death domain containing 1                                                                            | -4.05                                  | 3.8E-04 |
| GSMG0020090       | Ppp1r32   | protein phosphatase 1, regulatory subunit 32                                                         | -4.03                                  | 5.9E-03 |
| GSMG0029792       | Wdr66     | WD repeat domain 66                                                                                  | -3.99                                  | 2.4E-04 |
| GSMG0015617       | Atp13a5   | ATPase type 13A5                                                                                     | -3.93                                  | 1.0E-04 |
| GSMG0011235       | Sntn      | sentan, cilia apical structure protein                                                               | -3.86                                  | 1.6E-05 |
| GSMG0003879       | Myb       | myeloblastosis oncogene                                                                              | -3.86                                  | 8.6E-04 |
| GSMG0033364       | Ccdc37    | coiled-coil domain containing 37                                                                     | -3.81                                  | 5.4E-04 |
| GSMG0013041       | Dnah5     | dynein, axonemal, heavy chain 5                                                                      | -3.75                                  | 9.6E-05 |
| GSMG0060452       | Cfap46    | cilia and flagella associated protein 46                                                             | -3.70                                  | 4.1E-03 |
| GSMG0026023       | ---       | ---                                                                                                  | -3.70                                  | 1.1E-03 |
| GSMG0051586       | Ankrd66   | ankyrin repeat domain 66                                                                             | -3.65                                  | 3.0E-04 |
| GSMG0004063       | ---       | ---                                                                                                  | -3.56                                  | 4.4E-04 |
| GSMG0024302       | Stoml3    | stomatin (Epb7.2)-like 3                                                                             | -3.52                                  | 4.4E-03 |
| GSMG0022225       | ---       | ---                                                                                                  | -3.51                                  | 1.2E-03 |
| GSMG0001578       | Dnah7a    | dynein, axonemal, heavy chain 7A                                                                     | -3.50                                  | 5.2E-04 |
| GSMG0039010       | Slc7a5    | solute carrier family 7 (cationic amino acid transporter, Na <sup>+</sup> /K <sup>+</sup> dependent) | -3.49                                  | 1.8E-03 |
| GSMG0016942       | Vit       | vitrin                                                                                               | -3.48                                  | 1.2E-03 |
| GSMG0003014       | Fabp7     | fatty acid binding protein 7, brain                                                                  | -3.46                                  | 1.0E-04 |
| GSMG0051950       | Gm12695   | predicted gene 12695                                                                                 | -3.46                                  | 3.8E-04 |
| GSMG0044780       | Mir667    | microRNA 667                                                                                         | -3.45                                  | 4.4E-04 |

|             |             |                                                                                   |       |         |
|-------------|-------------|-----------------------------------------------------------------------------------|-------|---------|
| GSMG0014361 | Ttl8        | tubulin tyrosine ligase-like family, member 8                                     | -3.43 | 2.0E-04 |
| GSMG0017406 | Angptl4     | angiopoietin-like 4                                                               | -3.41 | 0.03    |
| GSMG0018390 | Zfp474      | zinc finger protein 474                                                           | -3.40 | 2.6E-04 |
| GSMG0002213 | Hmcn1       | hemicentin 1                                                                      | -3.38 | 2.1E-03 |
| GSMG0030218 | Fbxl13      | F-box and leucine-rich repeat protein 13                                          | -3.35 | 1.6E-04 |
| GSMG0027852 | Lpar1       | lysophosphatidic acid receptor 1                                                  | -3.29 | 2.0E-03 |
| GSMG0013758 | Slc1a3      | solute carrier family 1 (glial high affinity glutamate transporter)               | -3.28 | 1.1E-03 |
| GSMG0032429 | Slc6a13     | solute carrier family 6 (neurotransmitter transporter)                            | -3.26 | 8.2E-04 |
| GSMG0026471 | Car9        | carbonic anhydrase 9                                                              | -3.26 | 3.2E-04 |
| GSMG0006073 | Kcnj16      | potassium inwardly-rectifying channel, subfamily J, member 16                     | -3.22 | 1.0E-03 |
| GSMG0032007 | Ndnf        | neuron-derived neurotrophic factor                                                | -3.21 | 6.0E-04 |
| GSMG0034090 | Pglyrp1     | peptidoglycan recognition protein 1                                               | -3.18 | 2.5E-05 |
| GSMG0001823 | Slc19a3     | solute carrier family 19, member 3                                                | -3.18 | 1.7E-03 |
| GSMG0016909 | Fam179a     | family with sequence similarity 179, member A                                     | -3.18 | 1.9E-05 |
| GSMG0050826 | Iqca        | IQ motif containing with AAA domain                                               | -3.17 | 1.8E-03 |
| GSMG0037632 | Mt2         | metallothionein 2                                                                 | -3.15 | 3.0E-04 |
| GSMG0022070 | Nnat        | neuronatin                                                                        | -3.09 | 3.6E-04 |
| GSMG0025365 | Slc7a11     | solute carrier family 7 (cationic amino acid transporter)                         | -3.08 | 1.6E-03 |
| GSMG0050889 | Dnah1       | dynein, axonemal, heavy chain 1                                                   | -3.08 | 1.5E-03 |
| GSMG0014377 | Odf3b       | outer dense fiber of sperm tails 3B                                               | -3.08 | 5.6E-05 |
| GSMG0023891 | Slc13a3     | solute carrier family 13 (sodium-dependent dicarboxylate transporter)             | -3.05 | 6.6E-04 |
| GSMG0044790 | Mir154      | microRNA 154                                                                      | -3.04 | 4.0E-04 |
| GSMG0016452 | Cdkn1a      | cyclin-dependent kinase inhibitor 1A (P21)                                        | -3.03 | 0.05    |
| GSMG0044785 | Mir300      | microRNA 300                                                                      | -3.03 | 2.4E-03 |
| GSMG0017852 | Xdh         | xanthine dehydrogenase                                                            | -3.03 | 4.0E-03 |
| GSMG0021475 | Slc1a2      | solute carrier family 1 (glial high affinity glutamate transporter)               | -3.01 | 4.5E-03 |
| GSMG0004264 | Gm867       | predicted gene 867                                                                | -3.00 | 2.0E-05 |
| GSMG0019565 | Slc1a1      | solute carrier family 1 (neuronal/epithelial high affinity glutamate transporter) | -2.99 | 2.4E-04 |
| GSMG0008482 | Serpina3n   | serine (or cysteine) peptidase inhibitor, clade A, member 3n                      | -2.99 | 0.04    |
| GSMG0014385 | Syt10       | synaptotagmin X                                                                   | -2.99 | 1.3E-03 |
| GSMG0005688 | Car4        | carbonic anhydrase 4                                                              | -2.98 | 4.2E-03 |
| GSMG0051138 | Gm17455     | predicted gene, 17455                                                             | -2.98 | 3.4E-04 |
| GSMG0060093 | Ranbp3l     | RAN binding protein 3-like                                                        | -2.98 | 3.2E-04 |
| GSMG0032380 | Cxcl12      | chemokine (C-X-C motif) ligand 12                                                 | -2.96 | 5.1E-03 |
| GSMG0019363 | Slc22a6     | solute carrier family 22 (organic anion transporter)                              | -2.95 | 2.7E-03 |
| GSMG0051302 | Gm11710     | predicted gene 11710                                                              | -2.95 | 1.2E-04 |
| GSMG0052477 | Ccdc153     | coiled-coil domain containing 153                                                 | -2.94 | 1.1E-03 |
| GSMG0037397 | Pde4c       | phosphodiesterase 4C, cAMP specific                                               | -2.94 | 1.2E-04 |
| GSMG0039058 | Agt         | angiotensinogen (serpin peptidase inhibitor, clade S, member 1)                   | -2.92 | 6.1E-07 |
| GSMG0028856 | Sema3c      | sema domain, immunoglobulin domain (Ig), short version 3c                         | -2.91 | 4.2E-04 |
| GSMG0012462 | Gjb2        | gap junction protein, beta 2                                                      | -2.88 | 3.9E-03 |
| GSMG0034319 | Dmkn        | dermokine                                                                         | -2.87 | 5.2E-03 |
| GSMG0012464 | Gjb6        | gap junction protein, beta 6                                                      | -2.82 | 2.0E-04 |
| GSMG0022873 | Dpp4        | dipeptidylpeptidase 4                                                             | -2.82 | 6.8E-04 |
| GSMG0028587 | Gm694       | predicted gene 694                                                                | -2.81 | 2.4E-04 |
| GSMG0012697 | Fam216b     | family with sequence similarity 216, member B                                     | -2.81 | 4.6E-04 |
| GSMG0044787 | Mir487b     | microRNA 487b                                                                     | -2.81 | 2.0E-03 |
| GSMG0042749 | 930519F16R1 | RIKEN cDNA 4930519F16 gene                                                        | -2.80 | 1.4E-03 |
| GSMG0033855 | Abcc9       | ATP-binding cassette, sub-family C (CFTR/MRP)                                     | -2.80 | 4.0E-04 |
| GSMG0039347 | Hepacam     | hepatocyte cell adhesion molecule                                                 | -2.80 | 1.4E-04 |
| GSMG0051938 | Mir3095     | microRNA 3095                                                                     | -2.80 | 8.4E-04 |
| GSMG0043531 | Ttl3        | tubulin tyrosine ligase-like family, member 3                                     | -2.78 | 6.4E-05 |
| GSMG0021209 | Itga6       | integrin alpha 6                                                                  | -2.77 | 2.4E-03 |

|             |               |                                                     |       |         |
|-------------|---------------|-----------------------------------------------------|-------|---------|
| GSMG0026602 | Musk          | muscle, skeletal, receptor tyrosine kinase          | -2.76 | 2.9E-03 |
| GSMG0001167 | Dnah14        | dynein, axonemal, heavy chain 14                    | -2.76 | 5.0E-03 |
| GSMG0051084 | Col6a5        | collagen, type VI, alpha 5                          | -2.73 | 1.1E-03 |
| GSMG0036523 | Lyve1         | lymphatic vessel endothelial hyaluronan receptor    | -2.72 | 0.04    |
| GSMG0011342 | Asb14         | ankyrin repeat and SOCS box-containing 14           | -2.71 | 2.0E-05 |
| GSMG0032430 | Slc6a12       | solute carrier family 6 (neurotransmitter transport | -2.70 | 3.9E-03 |
| GSMG0014892 | Tfrc          | transferrin receptor                                | -2.70 | 4.2E-04 |
| GSMG0028755 | Vwa1          | von Willebrand factor A domain containing 1         | -2.70 | 5.2E-04 |
| GSMG0033882 | ntd1 // Gm38  | lamin tail domain containing 1 // predicted gene,   | -2.69 | 2.5E-03 |
| GSMG0004529 | Tmtc2         | transmembrane and tetratricopeptide repeat conta    | -2.69 | 1.2E-03 |
| GSMG0001548 | Slc40a1       | solute carrier family 40 (iron-regulated transporte | -2.69 | 2.2E-03 |
| GSMG0003006 | Gja1          | gap junction protein, alpha 1                       | -2.68 | 7.4E-04 |
| GSMG0004468 | Cfap54        | cilia and flagella associated protein 54            | -2.68 | 7.6E-05 |
| GSMG0016230 | Slc22a2       | solute carrier family 22 (organic cation transporte | -2.67 | 8.8E-03 |
| GSMG0016709 | Tcte1         | t-complex-associated testis expressed 1             | -2.66 | 1.6E-03 |
| GSMG0024713 | Hmgcs2        | 3-hydroxy-3-methylglutaryl-Coenzyme A synthase      | -2.65 | 0.01    |
| GSMG0002127 | Gpr3711       | G protein-coupled receptor 37-like 1                | -2.65 | 1.7E-03 |
| GSMG0000688 | Sctr          | secretin receptor                                   | -2.64 | 5.2E-04 |
| GSMG0006713 | Fam183b       | family with sequence similarity 183, member B       | -2.64 | 1.5E-03 |
| GSMG0004156 | Tspan15       | tetraspanin 15                                      | -2.63 | 1.0E-04 |
| GSMG0042422 | Akap14        | A kinase (PRKA) anchor protein 14                   | -2.63 | 1.0E-04 |
| GSMG0037996 | 930567H12R    | RIKEN cDNA 4930567H12 gene                          | -2.63 | 6.1E-05 |
| GSMG0040835 | Ccdc33        | coiled-coil domain containing 33                    | -2.63 | 2.4E-03 |
| GSMG0017434 | C4b           | complement component 4B (Chido blood group)         | -2.63 | 7.6E-05 |
| GSMG0029424 | Art3          | ADP-ribosyltransferase 3                            | -2.63 | 3.1E-03 |
| GSMG0022489 | Enkur         | enkurin, TRPC channel interacting protein           | -2.61 | 5.6E-04 |
| GSMG0024772 | Slc16a1       | solute carrier family 16 (monocarboxylic acid tra   | -2.61 | 4.3E-03 |
| GSMG0006181 | Ccdc40        | coiled-coil domain containing 40                    | -2.61 | 3.4E-04 |
| GSMG0032378 | 430408G22R    | RIKEN cDNA 8430408G22 gene                          | -2.61 | 0.01    |
| GSMG0002682 | Syne1         | spectrin repeat containing, nuclear envelope 1      | -2.60 | 3.2E-04 |
| GSMG0010761 | Ctla2b        | cytotoxic T lymphocyte-associated protein 2 beta    | -2.59 | 3.6E-03 |
| GSMG0002002 | Cfap221       | cilia and flagella associated protein 221           | -2.59 | 3.0E-03 |
| GSMG0028654 | Ptchd2        | patched domain containing 2                         | -2.59 | 3.8E-04 |
| GSMG0005819 | Ttll6         | tubulin tyrosine ligase-like family, member 6       | -2.59 | 7.0E-04 |
| GSMG0001924 | St8sia4       | ST8 alpha-N-acetyl-neuraminide alpha-2,8-sialyl     | -2.58 | 9.0E-04 |
| GSMG0044751 | Mir493        | microRNA 493                                        | -2.58 | 5.1E-03 |
| GSMG0037095 | Plat          | plasminogen activator, tissue                       | -2.58 | 1.0E-04 |
| GSMG0040487 | Dpy1912       | dpy-19-like 2 (C. elegans)                          | -2.56 | 1.2E-04 |
| GSMG0044773 | Mir329        | microRNA 329                                        | -2.55 | 2.4E-03 |
| GSMG0052074 | Apold1        | apolipoprotein L domain containing 1                | -2.55 | 0.04    |
| GSMG0021175 | Nostrin       | nitric oxide synthase trafficker                    | -2.55 | 5.0E-03 |
| GSMG0036249 | Ccdc81        | coiled-coil domain containing 81                    | -2.55 | 4.3E-03 |
| GSMG0003043 | ock2 // Mir69 | sparc/osteonectin, cwcv and kazal-like domains p    | -2.54 | 1.2E-03 |
| GSMG0008163 | Lrrc9         | leucine rich repeat containing 9                    | -2.54 | 1.2E-04 |
| GSMG0020688 | Mrc1          | mannose receptor, C type 1                          | -2.54 | 5.5E-03 |
| GSMG0016696 | Clic5         | chloride intracellular channel 5                    | -2.53 | 2.3E-03 |
| GSMG0037757 | Cdh1          | cadherin 1                                          | -2.51 | 2.8E-04 |
| GSMG0003846 | Ect2l         | epithelial cell transforming sequence 2 oncogene-   | -2.50 | 5.2E-04 |
| GSMG0037811 | Hydin         | HYDIN, axonemal central pair apparatus protein      | -2.50 | 4.1E-03 |
| GSMG0010552 | F13a1         | coagulation factor XIII, A1 subunit                 | -2.49 | 0.03    |
| GSMG0015187 | Robo1         | roundabout homolog 1 (Drosophila)                   | -2.49 | 0.02    |
| GSMG0043909 | Mir128-1      | microRNA 128-1                                      | -2.48 | 9.8E-04 |
| GSMG0007834 | Osr1          | odd-skipped related 1 (Drosophila)                  | -2.48 | 1.6E-04 |

|             |                 |                                                      |       |         |
|-------------|-----------------|------------------------------------------------------|-------|---------|
| GSMG0018589 | Mro             | maestro                                              | -2.48 | 3.7E-03 |
| GSMG0051045 | Dchs1           | dachsous 1 (Drosophila)                              | -2.47 | 1.4E-04 |
| GSMG0000497 | 933407L21Ri     | RIKEN cDNA 4933407L21 gene                           | -2.47 | 4.2E-04 |
| GSMG0023455 | Gatm            | glycine amidinotransferase (L-arginine:glycine ar    | -2.47 | 7.2E-04 |
| GSMG0014730 | Serpind1        | serine (or cysteine) peptidase inhibitor, clade D, r | -2.46 | 5.1E-03 |
| GSMG0039450 | Mpzl2           | myelin protein zero-like 2                           | -2.46 | 3.1E-03 |
| GSMG0053143 | 810047C21Ri     | RIKEN cDNA 2810047C21 gene 1                         | -2.45 | 0.01    |
| GSMG0010972 | ---             | ---                                                  | -2.45 | 1.8E-04 |
| GSMG0046912 | Mir126a         | microRNA 126a                                        | -2.45 | 1.6E-03 |
| GSMG0060409 | Mirlet7c-2 //   | microRNA let7b // microRNA let7c-2 // long inte      | -2.44 | 1.2E-04 |
| GSMG0046639 | Mir143          | microRNA 143                                         | -2.44 | 2.6E-04 |
| GSMG0050812 | Mir384          | microRNA 384                                         | -2.44 | 3.1E-03 |
| GSMG0008310 | Acot6           | acyl-CoA thioesterase 6                              | -2.43 | 8.8E-04 |
| GSMG0048759 | Mir29a          | microRNA 29a                                         | -2.43 | 0.02    |
| GSMG0044784 | Mir376a         | microRNA 376a                                        | -2.42 | 5.3E-03 |
| GSMG0002569 | Ccdc121         | coiled-coil domain containing 121                    | -2.42 | 5.8E-04 |
| GSMG0030671 | Tecrl           | trans-2,3-enoyl-CoA reductase-like                   | -2.41 | 9.2E-03 |
| GSMG0011998 | 930594M22Ri     | RIKEN cDNA 4930594M22 gene                           | -2.41 | 5.0E-04 |
| GSMG0032414 | Slc25a18        | solute carrier family 25 (mitochondrial carrier), n  | -2.41 | 3.8E-04 |
| GSMG0006878 | // Tnfsf13 // T | tumor necrosis factor (ligand) superfamily, memb     | -2.41 | 1.2E-04 |
| GSMG0016933 | Rasgrp3         | RAS, guanyl releasing protein 3                      | -2.40 | 3.8E-04 |
| GSMG0044758 | Mir136          | microRNA 136                                         | -2.40 | 1.7E-05 |
| GSMG0039844 | Cd109           | CD109 antigen                                        | -2.39 | 1.0E-03 |
| GSMG0021474 | Pamr1           | peptidase domain containing associated with mus      | -2.39 | 1.7E-03 |
| GSMG0051287 | Gm11517         | predicted gene 11517                                 | -2.37 | 1.2E-03 |
| GSMG0024736 | Casq2           | calsequestrin 2                                      | -2.37 | 2.4E-04 |
| GSMG0028528 | C1qa            | complement component 1, q subcomponent, alph         | -2.37 | 2.8E-03 |
| GSMG0039772 | Aldh1a2         | aldehyde dehydrogenase family 1, subfamily A2        | -2.36 | 6.9E-03 |
| GSMG0027725 | Fam166b         | family with sequence similarity 166, member B        | -2.36 | 1.1E-03 |
| GSMG0020654 | Itih5           | inter-alpha (globulin) inhibitor H5                  | -2.35 | 6.1E-05 |
| GSMG0007222 | Ankfn1          | ankyrin-repeat and fibronectin type III domain co    | -2.35 | 1.4E-04 |
| GSMG0006346 | Ddc             | dopa decarboxylase                                   | -2.35 | 3.7E-03 |
| GSMG0041467 | Hhatl           | hedgehog acyltransferase-like                        | -2.34 | 0.02    |
| GSMG0035929 | Abcc6           | ATP-binding cassette, sub-family C (CFTR/MRP         | -2.34 | 3.3E-03 |
| GSMG0015505 | Lrrc74b         | leucine rich repeat containing 74B                   | -2.34 | 7.8E-03 |
| GSMG0000301 | Gm973           | predicted gene 973                                   | -2.34 | 5.8E-05 |
| GSMG0027960 | ---             | ---                                                  | -2.34 | 0.03    |
| GSMG0000844 | ik // Mir181b   | RIKEN cDNA A430106G13 gene // microRNA 1             | -2.34 | 8.6E-04 |
| GSMG0032868 | Fam180a         | family with sequence similarity 180, member A        | -2.34 | 9.9E-03 |
| GSMG0001064 | Kcnj10          | potassium inwardly-rectifying channel, subfamily     | -2.34 | 2.0E-03 |
| GSMG0007750 | Notum           | notum pectinacylesterase homolog (Drosophila)        | -2.33 | 2.2E-04 |
| GSMG0023305 | Fibin           | fin bud initiation factor homolog (zebrafish)        | -2.33 | 1.4E-03 |
| GSMG0006982 | Serpinf1        | serine (or cysteine) peptidase inhibitor, clade F, n | -2.33 | 1.5E-03 |
| GSMG0041058 | Col12a1         | collagen, type XII, alpha 1                          | -2.32 | 8.4E-03 |
| GSMG0020116 | Ms4a7           | membrane-spanning 4-domains, subfamily A, me         | -2.32 | 6.8E-03 |
| GSMG0022384 | Gm10115         | predicted gene 10115                                 | -2.32 | 9.4E-03 |
| GSMG0032992 | Rarres2         | retinoic acid receptor responder (tazarotene induc   | -2.31 | 1.9E-03 |
| GSMG0036628 | Zkscan2         | zinc finger with KRAB and SCAN domains 2             | -2.31 | 3.1E-03 |
| GSMG0023972 | Gm10714         | predicted gene 10714                                 | -2.31 | 1.0E-03 |
| GSMG0007856 | Ntsr2           | neurotensin receptor 2                               | -2.31 | 1.3E-03 |
| GSMG0012711 | Rgcc            | regulator of cell cycle                              | -2.31 | 2.6E-04 |
| GSMG0012802 | ---             | ---                                                  | -2.30 | 1.3E-03 |
| GSMG0028816 | Sema3d          | sema domain, immunoglobulin domain (Ig), shor        | -2.30 | 1.7E-03 |

|             |            |                                                     |       |         |
|-------------|------------|-----------------------------------------------------|-------|---------|
| GSMG0036314 | Slco2b1    | solute carrier organic anion transporter family, m  | -2.28 | 7.0E-04 |
| GSMG0016842 | Adgre1     | adhesion G protein-coupled receptor E1              | -2.28 | 9.7E-05 |
| GSMG0042913 | Il13ra2    | interleukin 13 receptor, alpha 2                    | -2.28 | 6.4E-03 |
| GSMG0017879 | Cyp1b1     | cytochrome P450, family 1, subfamily b, polypep     | -2.28 | 2.2E-03 |
| GSMG0032993 | Gimap6     | GTPase, IMAP family member 6                        | -2.28 | 5.7E-03 |
| GSMG0022383 | Gm10855    | predicted gene 10855                                | -2.27 | 0.03    |
| GSMG0043690 | Cfap54     | cilia and flagella associated protein 54            | -2.27 | 0.02    |
| GSMG0022407 | Itih2      | inter-alpha trypsin inhibitor, heavy chain 2        | -2.27 | 4.4E-04 |
| GSMG0006671 | Slc22a4    | solute carrier family 22 (organic cation transporte | -2.27 | 1.6E-03 |
| GSMG0042279 | Gpm6b      | glycoprotein m6b                                    | -2.27 | 3.2E-03 |
| GSMG0044778 | Mir543     | microRNA 543                                        | -2.26 | 8.6E-04 |
| GSMG0001656 | Dytn       | dystrotelin                                         | -2.26 | 5.3E-03 |
| GSMG0007220 | 932411E22R | RIKEN cDNA 4932411E22 gene                          | -2.26 | 2.2E-03 |
| GSMG0030435 | Fgfbp1     | fibroblast growth factor binding protein 1          | -2.26 | 0.03    |
| GSMG0018047 | ---        | ---                                                 | -2.25 | 6.2E-05 |
| GSMG0007316 | Plxdc1     | plexin domain containing 1                          | -2.24 | 3.4E-03 |
| GSMG0035146 | ---        | ---                                                 | -2.24 | 5.1E-03 |
| GSMG0001550 | Slc39a10   | solute carrier family 39 (zinc transporter), membe  | -2.23 | 2.0E-03 |
| GSMG0012264 | ---        | ---                                                 | -2.23 | 6.3E-03 |
| GSMG0017486 | H2-T24     | histocompatibility 2, T region locus 24             | -2.23 | 2.8E-04 |
| GSMG0043694 | Slc26a10   | solute carrier family 26, member 10                 | -2.22 | 0.04    |
| GSMG0005598 | Vtn        | vitronectin                                         | -2.22 | 3.2E-03 |
| GSMG0012607 | 930012K11R | RIKEN cDNA 9930012K11 gene                          | -2.22 | 2.3E-05 |
| GSMG0000880 | Ivns1abp   | influenza virus NS1A binding protein                | -2.22 | 2.2E-03 |
| GSMG0030250 | ---        | ---                                                 | -2.21 | 1.3E-03 |
| GSMG0012801 | Tbc1d4     | TBC1 domain family, member 4                        | -2.21 | 1.0E-04 |
| GSMG0003342 | Rfx4       | regulatory factor X, 4 (influences HLA class II ex  | -2.21 | 1.3E-03 |
| GSMG0000737 | Gm16083    | predicted gene 16083                                | -2.21 | 4.4E-03 |
| GSMG0032382 | Gm9946     | predicted gene 9946                                 | -2.21 | 1.9E-03 |
| GSMG0034878 | P4ha3      | procollagen-proline, 2-oxoglutarate 4-dioxygenas    | -2.21 | 1.6E-04 |
| GSMG0000283 | Aox3       | aldehyde oxidase 3                                  | -2.20 | 0.01    |
| GSMG0029801 | B3gnt4     | UDP-GlcNAc:betaGal beta-1,3-N-acetylglucosar        | -2.20 | 7.9E-05 |
| GSMG0041026 | Scg3       | secretogranin III                                   | -2.19 | 6.2E-04 |
| GSMG0060610 | Mir361     | microRNA 361                                        | -2.18 | 1.7E-03 |
| GSMG0052118 | Vmn2r40    | vomer nasal 2, receptor 40                          | -2.18 | 3.5E-03 |
| GSMG0001242 | Slc30a1    | solute carrier family 30 (zinc transporter), membe  | -2.18 | 0.01    |
| GSMG0031567 | Ptprz1     | protein tyrosine phosphatase, receptor type Z, pol  | -2.18 | 2.7E-03 |
| GSMG0008754 | Rsad2      | radical S-adenosyl methionine domain containing     | -2.18 | 1.2E-03 |
| GSMG0004219 | 930033H14R | RIKEN cDNA A930033H14 gene                          | -2.17 | 1.5E-05 |
| GSMG0035489 | Vmn2r30    | vomer nasal 2, receptor 30                          | -2.17 | 1.5E-03 |
| GSMG0040565 | Gm3428     | predicted gene 3428                                 | -2.17 | 9.2E-03 |
| GSMG0052934 | Mir5128    | microRNA 5128                                       | -2.17 | 3.5E-03 |
| GSMG0023658 | Thbd       | thrombomodulin                                      | -2.17 | 8.0E-05 |
| GSMG0033399 | Adamts9    | a disintegrin-like and metalloproteinase (reprolysi | -2.16 | 6.4E-04 |
| GSMG0013475 | Ribc2      | RIB43A domain with coiled-coils 2                   | -2.16 | 1.9E-05 |
| GSMG0032877 | Ptn        | pleiotrophin                                        | -2.16 | 4.2E-04 |
| GSMG0039538 | Slc35f2    | solute carrier family 35, member F2                 | -2.16 | 4.8E-03 |
| GSMG0004469 | Cfap54     | cilia and flagella associated protein 54            | -2.15 | 0.02    |
| GSMG0036788 | ---        | ---                                                 | -2.15 | 3.7E-03 |
| GSMG0016992 | Plekhh2    | pleckstrin homology domain containing, family H     | -2.15 | 2.4E-04 |
| GSMG0033889 | Itp2       | inositol 1,4,5-triphosphate receptor 2              | -2.15 | 2.0E-03 |
| GSMG0036575 | Tmc7       | transmembrane channel-like gene family 7            | -2.15 | 6.9E-03 |
| GSMG0008499 | Ak7        | adenylate kinase 7                                  | -2.15 | 2.8E-03 |

|             |                 |                                                     |       |         |
|-------------|-----------------|-----------------------------------------------------|-------|---------|
| GSMG0016386 | Ccdc78          | coiled-coil domain containing 78                    | -2.14 | 8.3E-05 |
| GSMG0008538 | ---             | ---                                                 | -2.14 | 5.3E-03 |
| GSMG0031304 | Mmd2            | monocyte to macrophage differentiation-associated   | -2.14 | 2.2E-03 |
| GSMG0022339 | Meig1           | meiosis expressed gene 1                            | -2.14 | 0.01    |
| GSMG0000789 | Fmod            | fibromodulin                                        | -2.14 | 6.4E-03 |
| GSMG0015810 | Alcam           | activated leukocyte cell adhesion molecule          | -2.13 | 5.6E-04 |
| GSMG0052703 | Lyz2            | lysozyme 2                                          | -2.13 | 1.3E-03 |
| GSMG0003870 | Pde7b           | phosphodiesterase 7B                                | -2.12 | 1.6E-03 |
| GSMG0029252 | Gm15478         | predicted gene 15478                                | -2.12 | 0.01    |
| GSMG0000461 | acs13 // Utp14  | acyl-CoA synthetase long-chain family member 3      | -2.12 | 3.5E-05 |
| GSMG0031384 | Slc7a1          | solute carrier family 7 (cationic amino acid transp | -2.12 | 1.3E-03 |
| GSMG0035491 | Gm3912          | predicted gene 3912                                 | -2.11 | 0.02    |
| GSMG0018479 | Apcdd1          | adenomatosis polyposis coli down-regulated 1        | -2.11 | 1.0E-04 |
| GSMG0003452 | Dcn             | decorin                                             | -2.11 | 7.4E-04 |
| GSMG0014978 | Igsf11          | immunoglobulin superfamily, member 11               | -2.11 | 7.6E-04 |
| GSMG0006040 | 810010H24R      | RIKEN cDNA 1810010H24 gene                          | -2.10 | 1.4E-03 |
| GSMG0050947 | Kif6            | kinesin family member 6                             | -2.10 | 2.7E-03 |
| GSMG0043689 | Cfap54          | cilia and flagella associated protein 54            | -2.10 | 2.1E-03 |
| GSMG0032268 | ---             | ---                                                 | -2.10 | 1.3E-03 |
| GSMG0013994 | Gm16006         | predicted gene 16006                                | -2.10 | 0.02    |
| GSMG0036508 | AA474408        | expressed sequence AA474408                         | -2.10 | 5.9E-03 |
| GSMG0040282 | Ccr9            | chemokine (C-C motif) receptor 9                    | -2.10 | 0.01    |
| GSMG0007643 | ---             | ---                                                 | -2.09 | 2.7E-03 |
| GSMG0016872 | Lama1           | laminin, alpha 1                                    | -2.09 | 9.8E-04 |
| GSMG0034268 | Rasgrp4         | RAS guanyl releasing protein 4                      | -2.09 | 4.8E-03 |
| GSMG0038486 | Cpe             | carboxypeptidase E                                  | -2.08 | 2.0E-04 |
| GSMG0060428 | 2 // Palm2 // 1 | A kinase (PRKA) anchor protein 2 // paralemmin      | -2.08 | 5.0E-04 |
| GSMG0046003 | ora34 // Mir12  | small nucleolar RNA, H/ACA box 34 // microRN        | -2.08 | 2.2E-03 |
| GSMG0029384 | Slc4a4          | solute carrier family 4 (anion exchanger), membe    | -2.08 | 5.8E-04 |
| GSMG0036120 | St8sia2         | ST8 alpha-N-acetyl-neuraminide alpha-2,8-sialyl     | -2.07 | 3.8E-04 |
| GSMG0002211 | Prg4            | proteoglycan 4 (megakaryocyte stimulating facto     | -2.07 | 8.1E-03 |
| GSMG0025609 | Bcan            | brevican                                            | -2.07 | 1.6E-04 |
| GSMG0036161 | Anpep           | alanyl (membrane) aminopeptidase                    | -2.07 | 1.4E-03 |
| GSMG0025453 | 4 // F630111I   | purinergic receptor P2Y, G-protein coupled, 14 //   | -2.07 | 0.02    |
| GSMG0010630 | Mirlet7d        | microRNA let7d                                      | -2.07 | 2.8E-03 |
| GSMG0044771 | Mir323          | microRNA 323                                        | -2.07 | 6.3E-03 |
| GSMG0027304 | Padi2           | peptidyl arginine deiminase, type II                | -2.06 | 2.5E-05 |
| GSMG0046877 | Mir194-2        | microRNA 194-2                                      | -2.06 | 1.4E-03 |
| GSMG0029465 | 700007G11R      | RIKEN cDNA 1700007G11 gene                          | -2.06 | 6.3E-03 |
| GSMG0016523 | Kank3           | KN motif and ankyrin repeat domains 3               | -2.06 | 1.4E-03 |
| GSMG0025512 | Bche            | butyrylcholinesterase                               | -2.06 | 0.01    |
| GSMG0060465 | ---             | ---                                                 | -2.05 | 0.04    |
| GSMG0001197 | Slc30a10        | solute carrier family 30, member 10                 | -2.05 | 5.8E-04 |
| GSMG0028527 | C1qc            | complement component 1, q subcomponent, C ch        | -2.05 | 0.03    |
| GSMG0033878 | Casc1           | cancer susceptibility candidate 1                   | -2.05 | 8.5E-03 |
| GSMG0010971 | Pde8b           | phosphodiesterase 8B                                | -2.05 | 4.8E-04 |
| GSMG0008227 | ---             | ---                                                 | -2.05 | 1.2E-03 |
| GSMG0045400 | Mir18           | microRNA 18                                         | -2.04 | 4.4E-05 |
| GSMG0021390 | Lrp4            | low density lipoprotein receptor-related protein 4  | -2.04 | 1.8E-04 |
| GSMG0042268 | Ace2            | angiotensin I converting enzyme (peptidyl-dipept    | -2.04 | 3.0E-03 |
| GSMG0014261 | 730005E14R      | RIKEN cDNA D730005E14 gene                          | -2.04 | 1.5E-03 |
| GSMG0000904 | Teddm1a         | transmembrane epididymal protein 1A                 | -2.04 | 0.02    |
| GSMG0011585 | Mhrt            | myosin heavy chain associated RNA transcript        | -2.04 | 0.01    |

|             |            |                                                     |       |         |
|-------------|------------|-----------------------------------------------------|-------|---------|
| GSMG0019619 | Ifit2      | interferon-induced protein with tetratricopeptide   | -2.03 | 7.8E-04 |
| GSMG0025068 | Ddah1      | dimethylarginine dimethylaminohydrolase 1           | -2.03 | 1.6E-03 |
| GSMG0029510 | Spp1       | secreted phosphoprotein 1                           | -2.03 | 2.3E-03 |
| GSMG0041491 | Slc6a20a   | solute carrier family 6 (neurotransmitter transport | -2.03 | 2.2E-03 |
| GSMG0012715 | Lect1      | leukocyte cell derived chemotaxin 1                 | -2.02 | 5.0E-04 |
| GSMG0023086 | Olf1046    | olfactory receptor 1046                             | -2.02 | 3.2E-03 |
| GSMG0026189 | Ptgfr      | prostaglandin F receptor                            | -2.02 | 2.6E-03 |
| GSMG0010763 | Ctla2a     | cytotoxic T lymphocyte-associated protein 2 alph    | -2.02 | 7.0E-03 |
| GSMG0006088 | Ttyh2      | tweety homolog 2 (Drosophila)                       | -2.02 | 2.0E-03 |
| GSMG0051009 | Dnah6      | dynein, axonemal, heavy chain 6                     | -2.02 | 7.8E-03 |
| GSMG0002916 | Ppil6      | peptidylprolyl isomerase (cyclophilin)-like 6       | -2.02 | 0.04    |
| GSMG0049845 | Mir27a     | microRNA 27a                                        | -2.01 | 0.01    |
| GSMG0030436 | Prom1      | prominin 1                                          | -2.01 | 6.4E-03 |
| GSMG0019501 | 030003E18R | RIKEN cDNA E030003E18 gene                          | -2.01 | 1.5E-03 |
| GSMG0000484 | Daw1       | dynein assembly factor with WDR repeat domain       | -2.01 | 0.02    |
| GSMG0019028 | Afap111    | actin filament associated protein 1-like 1          | -2.01 | 0.02    |
| GSMG0019503 | Aldh1a1    | aldehyde dehydrogenase family 1, subfamily A1       | -2.01 | 2.8E-04 |
| GSMG0028769 | Isg15      | ISG15 ubiquitin-like modifier                       | -2.01 | 3.7E-03 |
| GSMG0039354 | Vsig2      | V-set and immunoglobulin domain containing 2        | -2.01 | 2.5E-03 |
| GSMG0060569 | Mir669n    | microRNA 669n                                       | -2.01 | 2.1E-03 |
| GSMG0026052 | Enpep      | glutamyl aminopeptidase                             | -2.01 | 7.2E-04 |
| GSMG0014129 | Ly6c2      | lymphocyte antigen 6 complex, locus C2              | -2.00 | 2.8E-03 |
| GSMG0028766 | Tll10      | tubulin tyrosine ligase-like family, member 10      | -2.00 | 1.3E-03 |
| GSMG0052660 | Ripply1    | rippy1 homolog (zebrafish)                          | -2.00 | 0.03    |
