# Supplementary material for: Translation in astrocyte distal processes sets molecular heterogeneity at the gliovascular interface
Source: PubMed Central journal article supplement (PMC5368712; doi:10.1038/celldisc.2017.5), 2017-03-28
Supplement: celldisc20175-s4.pdf [file celldisc20175-s4.pdf]

**Table S2** Gene Ontology analysis of the astrocyte endfeet transcriptome. The “cellular component” and “biological process” GO pathways significantly depleted upon BL digestion are grouped by cellular compartment (cytoplasm, cytoskeleton, extracellular and membrane) and functions (development, extracellular matrix, metabolism, microtubule, signalisation and transport/homeostasis). Number of entities, the number of transcripts referenced in the pathway; number of measured entities, the number of transcripts found in the transcriptome; Median FC, median change of expression upon BL digestion. A negative score indicates a depletion upon digestion, thus an enrichment of the pathway in the endfeet.

| Term type                    | GO Term                            | Number of entities | Number of measured entities | Median FC | p-value  | Category      |
|------------------------------|------------------------------------|--------------------|-----------------------------|-----------|----------|---------------|
| Cellular component           | apical part of cell                | 136                | 13                          | -2.0      | 8.62E-04 | Cytoplasm     |
|                              | cell projection                    | 575                | 32                          | -2.6      | 1.37E-03 |               |
|                              | cell projection part               | 170                | 14                          | -3.0      | 1.99E-03 |               |
|                              | microtubule cytoskeleton           | 450                | 15                          | -3.1      | 0        | Cytoskeleton  |
|                              | cytoskeletal part                  | 774                | 18                          | -2.9      | 0        |               |
|                              | microtubule                        | 240                | 8                           | -3.6      | 0        |               |
|                              | axoneme                            | 37                 | 9                           | -3.8      | 1.16E-05 |               |
|                              | dynein complex                     | 34                 | 7                           | -3.8      | 4.82E-04 |               |
|                              | cilium                             | 135                | 13                          | -3.4      | 8.07E-04 |               |
|                              | cilium axoneme                     | 23                 | 5                           | -3.4      | 4.61E-03 |               |
|                              | axonemal dynein complex            | 6                  | 3                           | -3.8      | 1.26E-02 |               |
|                              | microtubule associated complex     | 76                 | 7                           | -3.8      | 2.72E-02 |               |
|                              | cilium part                        | 41                 | 5                           | -3.4      | 3.45E-02 |               |
|                              | axoneme part                       | 10                 | 3                           | -3.8      | 3.49E-02 |               |
|                              | cell surface                       | 305                | 14                          | -2.3      | 0        | Extracellular |
|                              | extracellular matrix part          | 92                 | 5                           | -2.7      | 0        |               |
|                              | extracellular region               | 1680               | 91                          | -2.2      | 3.09E-07 |               |
|                              | extracellular region part          | 774                | 50                          | -2.2      | 4.09E-06 |               |
|                              | extracellular matrix               | 309                | 22                          | -2.2      | 4.82E-04 |               |
|                              | extracellular space                | 511                | 32                          | -2.3      | 8.84E-04 |               |
|                              | proteinaceous extracellular matrix | 297                | 20                          | -2.2      | 1.78E-03 |               |
|                              | connexon complex                   | 19                 | 3                           | -2.8      | 0        | Membrane      |
|                              | plasma membrane                    | 2906               | 125                         | -2.1      | 1.88E-04 |               |
|                              | plasma membrane part               | 1633               | 71                          | -2.0      | 8.53E-03 |               |
|                              | apical plasma membrane             | 99                 | 9                           | -2.0      | 1.01E-02 |               |
| integral to plasma membrane  | 531                                | 25                 | -2.0                        | 3.29E-02  |          |               |
| gap junction                 | 27                                 | 4                  | -2.8                        | 4.68E-02  |          |               |
| intrinsic to plasma membrane | 552                                | 25                 | -2.0                        | 4.82E-02  |          |               |

| Term type                      | GO Term                                             | Number of entities | Number of measured entities | Median FC | p-value  | Category                                 |
|--------------------------------|-----------------------------------------------------|--------------------|-----------------------------|-----------|----------|------------------------------------------|
| Biological process             | nervous system development                          | 854                | 19                          | -2.5      | 0        | Development                              |
|                                | anatomical structure morphogenesis                  | 1114               | 27                          | -2.5      | 0        |                                          |
|                                | system development                                  | 2027               | 40                          | -2.4      | 0        |                                          |
|                                | anatomical structure development                    | 2170               | 42                          | -2.4      | 0        |                                          |
|                                | developmental process                               | 2743               | 50                          | -2.4      | 0        |                                          |
|                                | blood vessel development                            | 244                | 10                          | -2.4      | 0        |                                          |
|                                | multicellular organismal development                | 2521               | 46                          | -2.4      | 0        |                                          |
|                                | cell adhesion                                       | 561                | 31                          | -2.1      | 9.40E-04 | Extracellular matrix/adhesion            |
|                                | positive regulation of cell-substrate adhesion      | 27                 | 6                           | -2.4      | 9.50E-04 |                                          |
|                                | biological adhesion                                 | 562                | 31                          | -2.1      | 9.64E-04 |                                          |
|                                | positive regulation of cell adhesion                | 43                 | 7                           | -2.5      | 1.40E-03 |                                          |
|                                | regulation of cell adhesion                         | 94                 | 10                          | -2.2      | 1.59E-03 |                                          |
|                                | extracellular matrix organization                   | 101                | 10                          | -2.6      | 2.62E-03 |                                          |
|                                | extracellular structure organization                | 149                | 12                          | -2.6      | 4.08E-03 |                                          |
|                                | regulation of cell-substrate adhesion               | 40                 | 6                           | -2.4      | 5.69E-03 |                                          |
|                                | chondroitin sulfate metabolic process               | 14                 | 3                           | -2.5      | 0        | Metabolism                               |
|                                | chondroitin sulfate proteoglycan metabolic process  | 16                 | 3                           | -2.5      | 0        |                                          |
|                                | glycosaminoglycan metabolic process                 | 40                 | 7                           | -2.5      | 9.50E-04 |                                          |
|                                | aminoglycan metabolic process                       | 52                 | 7                           | -2.5      | 3.76E-03 |                                          |
|                                | amine metabolic process                             | 336                | 23                          | -2.3      | 3.27E-04 |                                          |
|                                | polysaccharide metabolic process                    | 92                 | 9                           | -2.4      | 5.18E-03 |                                          |
|                                | hormone metabolic process                           | 90                 | 8                           | -2.0      | 1.55E-02 |                                          |
|                                | isoprenoid biosynthetic process                     | 22                 | 4                           | -2.2      | 2.47E-02 |                                          |
|                                | vitamin metabolic process                           | 69                 | 6                           | -2.1      | 4.95E-02 |                                          |
|                                | cellular amino acid derivative biosynthetic process | 48                 | 5                           | -2.5      | 4.97E-02 |                                          |
|                                | cellular amino acid derivative metabolic process    | 141                | 6                           | -2.4      | 0        |                                          |
|                                | glycoprotein metabolic process                      | 147                | 6                           | -2.4      | 0        |                                          |
|                                | protein polyglycylation                             | 3                  | 3                           | -2.8      | 2.46E-03 |                                          |
|                                | peptide cross-linking                               | 17                 | 4                           | -2.5      | 1.21E-02 |                                          |
|                                | peptide cross-linking via chondroitin 4-sulfate g   | 8                  | 3                           | -2.5      | 2.08E-02 |                                          |
|                                | microtubule-based movement                          | 101                | 9                           | -3.5      | 8.99E-03 | Microtubule                              |
|                                | microtubule-based process                           | 211                | 12                          | -2.9      | 4.36E-02 |                                          |
|                                | cellular response to extracellular stimulus         | 45                 | 5                           | -2.8      | 4.07E-02 | Signalisation                            |
|                                | response to external stimulus                       | 640                | 29                          | -2.4      | 1.99E-02 |                                          |
|                                | regulation of hormone levels                        | 128                | 9                           | -2.0      | 3.27E-02 |                                          |
|                                | response to extracellular stimulus                  | 133                | 9                           | -2.5      | 3.96E-02 |                                          |
|                                | response to wounding                                | 347                | 17                          | -2.4      | 4.59E-02 |                                          |
|                                | positive regulation of cell communication           | 189                | 7                           | -2.9      | 0        |                                          |
|                                | response to stimulus                                | 2437               | 48                          | -2.5      | 0        |                                          |
|                                | positive regulation of biological process           | 1493               | 33                          | -2.4      | 0        |                                          |
|                                | immune effector process                             | 126                | 8                           | -2.4      | 0        |                                          |
|                                | immune response                                     | 471                | 15                          | -2.4      | 0        |                                          |
|                                | carboxylic acid transport                           | 99                 | 16                          | -2.1      | 1.54E-07 | Transport/homeostasis of small molecules |
|                                | organic acid transport                              | 100                | 16                          | -2.1      | 1.76E-07 |                                          |
|                                | amino acid transport                                | 71                 | 12                          | -2.1      | 5.67E-06 |                                          |
| organic anion transport        | 39                                                  | 9                  | -2.3                        | 1.29E-05  |          |                                          |
| amine transport                | 92                                                  | 12                 | -2.1                        | 6.90E-05  |          |                                          |
| dicarboxylic acid transport    | 11                                                  | 4                  | -3.0                        | 3.35E-03  |          |                                          |
| metal ion transport            | 442                                                 | 24                 | -2.0                        | 5.08E-03  |          |                                          |
| transition metal ion transport | 70                                                  | 7                  | -2.1                        | 1.57E-02  |          |                                          |
| cellular zinc ion homeostasis  | 7                                                   | 3                  | -2.2                        | 1.59E-02  |          |                                          |
| zinc ion homeostasis           | 8                                                   | 3                  | -2.2                        | 2.08E-02  |          |                                          |
| zinc ion transport             | 22                                                  | 4                  | -2.1                        | 2.47E-02  |          |                                          |
