# Supplementary material for: Translation in astrocyte distal processes sets molecular heterogeneity at the gliovascular interface
Source: PubMed Central journal article supplement (PMC5368712; doi:10.1038/celldisc.2017.5), 2017-03-28
Supplement: celldisc20175-s6.pdf [file celldisc20175-s6.pdf]

**Table S4** Gene Ontology analysis of the astrocyte endfeet ribosome-bound transcriptome.

The first 25 most enriched “cellular component” and “biological process” GO pathways in the endfeet compared to the astrocyte TRAP transcriptomes are grouped by cellular compartment (extracellular, membrane and intracellular organelles) and biological functions (extracellular matrix, immunity, transport, vascular functions). Number of entities, the number of transcripts referenced in the pathway; Number of measured entities, the number of transcripts found in the TRAP transcriptomes; Median FC, the median change of expression between the astrocyte and endfeet TRAP transcriptomes. A positive score indicates an enrichment of the pathway in the endfeet.

| Term type                       | GO Term                               | Number of entities | Number of measured entities | Median FC | p-value                  | Category      |
|---------------------------------|---------------------------------------|--------------------|-----------------------------|-----------|--------------------------|---------------|
| Cellular component              | extracellular region                  | 2319               | 1357                        | 1.3       | 3.4E-47                  | Extracellular |
|                                 | extracellular matrix                  | 250                | 216                         | 1.9       | 2.5E-35                  |               |
|                                 | proteinaceous extracellular matrix    | 318                | 259                         | 1.8       | 2.7E-35                  |               |
|                                 | extracellular space                   | 1166               | 718                         | 1.4       | 7.1E-35                  |               |
|                                 | cell surface                          | 508                | 418                         | 1.5       | 6.4E-21                  |               |
|                                 | basement membrane                     | 108                | 86                          | 2.3       | 2.0E-19                  |               |
|                                 | collagen                              | 98                 | 74                          | 2.3       | 1.4E-17                  |               |
|                                 | basal lamina                          | 20                 | 16                          | 2.5       | 4.0E-07                  |               |
|                                 | laminin-1 complex                     | 7                  | 7                           | 3.3       | 1.0E-05                  |               |
|                                 | integral component of membrane        | 7193               | 3863                        | 1.3       | 7.4E-32                  | Membrane      |
|                                 | integral component of plasma membrane | 1292               | 926                         | 1.4       | 4.7E-29                  |               |
|                                 | external side of plasma membrane      | 292                | 199                         | 1.9       | 8.5E-26                  |               |
|                                 | plasma membrane                       | 5701               | 3124                        | 1.2       | 9.4E-22                  |               |
|                                 | membrane                              | 7556               | 5362                        | 1.16      | 4.40E-17                 |               |
|                                 | integrin complex                      | 30                 | 27                          | 2.3       | 2.0E-09                  |               |
|                                 | receptor complex                      | 123                | 102                         | 1.5       | 1.6E-08                  |               |
|                                 | apical plasma membrane                | 301                | 248                         | 1.3       | 7.2E-08                  |               |
| basolateral plasma membrane     | 185                                   | 157                | 1.4                         | 1.0E-07   |                          |               |
| membrane raft                   | 210                                   | 172                | 1.3                         | 2.9E-06   |                          |               |
| endoplasmic reticulum lumen     | 187                                   | 155                | 1.6                         | 3.6E-17   | Intracellular organelles |               |
| platelet alpha granule lumen    | 48                                    | 39                 | 1.9                         | 1.6E-07   |                          |               |
| extracellular vesicular exosome | 83                                    | 70                 | 1.6                         | 2.9E-07   |                          |               |
| lysosome                        | 307                                   | 258                | 1.3                         | 3.2E-07   |                          |               |
| lysosomal lumen                 | 73                                    | 67                 | 1.6                         | 2.6E-06   |                          |               |
| Golgi lumen                     | 88                                    | 62                 | 1.6                         | 9.9E-06   |                          |               |

| Term type                           | GO Term                               | Number of entities | Number of measured entities | Median FC | p-value            | Category                           |
|-------------------------------------|---------------------------------------|--------------------|-----------------------------|-----------|--------------------|------------------------------------|
| Biological process                  | extracellular matrix organization     | 290                | 239                         | 1.87      | 1.31E-38           | Extracellular matrix/cell adhesion |
|                                     | cell adhesion                         | 658                | 542                         | 1.38      | 1.18E-22           |                                    |
|                                     | extracellular matrix disassembly      | 82                 | 63                          | 2.19      | 2.93E-18           |                                    |
|                                     | collagen catabolic process            | 74                 | 60                          | 2.02      | 3.14E-17           |                                    |
|                                     | cell-cell adhesion                    | 144                | 125                         | 1.46      | 8.47E-10           |                                    |
|                                     | glycosaminoglycan metabolic process   | 115                | 107                         | 1.58      | 1.02E-09           |                                    |
|                                     | cell-matrix adhesion                  | 87                 | 79                          | 1.76      | 1.18E-09           |                                    |
|                                     | collagen fibril organization          | 45                 | 37                          | 1.99      | 4.03E-09           |                                    |
|                                     | positive regulation of cell migration | 158                | 137                         | 1.49      | 1.02E-08           |                                    |
|                                     | immune response                       | 449                | 260                         | 1.49      | 1.29E-18           | Immunity                           |
|                                     | immune system process                 | 308                | 270                         | 1.50      | 1.85E-16           |                                    |
|                                     | inflammatory response                 | 367                | 283                         | 1.38      | 2.42E-14           |                                    |
|                                     | wound healing                         | 121                | 92                          | 1.69      | 2.53E-14           |                                    |
|                                     | regulation of immune response         | 114                | 63                          | 1.90      | 3.99E-12           |                                    |
|                                     | response to lipopolysaccharide        | 228                | 186                         | 1.30      | 6.67E-12           |                                    |
|                                     | leukocyte migration                   | 115                | 99                          | 1.71      | 3.19E-09           |                                    |
|                                     | defense response to bacterium         | 226                | 67                          | 1.54      | 3.86E-08           |                                    |
|                                     | aging                                 | 211                | 183                         | 1.20      | 4.46E-08           |                                    |
|                                     | transmembrane transport               | 717                | 595                         | 1.29      | 3.60E-09           | Transport                          |
|                                     | ion transport                         | 650                | 552                         | 1.26      | 9.90E-09           |                                    |
| angiogenesis                        | 249                                   | 208                | 1.41                        | 1.09E-14  | Vascular functions |                                    |
| positive regulation of angiogenesis | 114                                   | 87                 | 1.65                        | 3.14E-13  |                    |                                    |
| blood coagulation                   | 482                                   | 398                | 1.30                        | 4.67E-11  |                    |                                    |
| platelet degranulation              | 81                                    | 68                 | 1.67                        | 5.12E-10  |                    |                                    |
| response to hypoxia                 | 251                                   | 220                | 1.21                        | 2.41E-09  |                    |                                    |
