# Supplementary material for: Translation in astrocyte distal processes sets molecular heterogeneity at the gliovascular interface
Source: PubMed Central journal article supplement (PMC5368712; doi:10.1038/celldisc.2017.5), 2017-03-28
Supplement: celldisc20175-s7.pdf [file celldisc20175-s7.pdf]

|             | <b>Accession No</b> | <b>Gene name</b> | <b>Catalog number<br/>Advanced Cell<br/>Diagnostics</b> | <b>Target Region</b> | <b>Channel</b> |
|-------------|---------------------|------------------|---------------------------------------------------------|----------------------|----------------|
| FISH probes | NM_009700.2         | Aqp4-C2          | 417161-C2                                               | 1646 - 2644          | C2             |
|             | NM_007428.3         | Agt              | 426941                                                  | 347 - 1538           | C1             |
|             | NM_009655.2         | Alcam            | 462061                                                  | 501 - 1441           | C1             |
|             | NM_021704.3         | Cxcl12 $\alpha$  | 460921                                                  | 431 - 1496           | C1             |
|             | EF191515            | dapB             | 310043                                                  | 414 - 862            | C1             |
|             | NM_001010937.2      | Gjb6             | 458811                                                  | 251 - 1383           | C1             |
|             | NM_134438.3         | Gpr3711          | 319301                                                  | 251 - 1388           | C1             |
|             | NM_175189.4         | Hepacam          | 476101                                                  | 166 - 1082           | C1             |
|             | NM_008397.4         | Itga6            | 441701                                                  | 895 - 1860           | C1             |
|             | NM_009022.4         | Lpar1            | 318591                                                  | 188 - 1315           | C1             |
|             | NM_010865.3         | Myoc             | 460981                                                  | 102 - 1068           | C1             |
|             | NM_010865.3         | Myoc             | 460981                                                  | 102 - 1068           | C1             |
|             | NM_001081306.1      | Ptprz1           | 460991                                                  | 1374 - 2358          | C1             |
| NM_054055.2 | Slc13a3             | 461041           | 149 - 1111                                              | C1                   |                |

|            | <b>Gene name</b> | <b>Species</b>                  | <b>company</b>     | <b>Dilution</b>           |                     |
|------------|------------------|---------------------------------|--------------------|---------------------------|---------------------|
|            |                  |                                 |                    | <b>Immunofluorescence</b> | <b>Western Blot</b> |
| Antibodies | Acta2            | Mouse monoclonal<br>(clone 1A4) | Sigma              | 1/500                     | 1/500               |
|            | Aqp4             | Rabbit polyclonal               | Sigma              | 1/400                     | 1/500               |
|            | Cldn5            | Rabbit polyclonal               | Thermo fisher      | /                         | 1/500               |
|            | Cx26             | Rabbit polyclonal               | Thermo fisher      | 1/500                     | 1/500               |
|            | Cx43             | Mouse monoclonal                | BD Bioscience      | 1/500                     | 1/500               |
|            | GFAP             | Chicken polyclonal              | Abcam              | 1/500                     | /                   |
|            | Gl1              | Rabbit polyclonal               | Frontier institute | 1/1000                    | 1/10000             |
|            | H3               | Rabbit polyclonal               | Cell signaling     | /                         | 1/2000              |
|            | Hepacam/Glialcam | Rabbit polyclonal               | Raul Estevez       | 1/500                     | /                   |
|            | Kir4.1           | Rabbit polyclonal               | Alomone Labs       | 1/500                     | 1/500               |

**Table S5** List of antibodies and FISH probes
